# Supplementary material for: Dandelion-like ZnS/carbon quantum dots hybrid materials with enhanced photocatalytic activity toward organic pollutants
Source: Royal Society of Chemistry journal article supplement (doi:10.1039/c6ra02840c), 2016-01-01
Supplement: c6ra02840c1.pdf [file c6ra02840c1.pdf]

## Supplementary Information

### Dandelion-like ZnS/carbon quantum dots hybrid materials with enhanced photocatalytic activity toward organic pollutants

Fangwang Ming,<sup>a</sup> Jinqing Hong,<sup>a</sup> Xun Xu,<sup>a</sup> Zhoucheng Wang<sup>\*a</sup>

<sup>a</sup> Department of Chemical and Biochemical Engineering, College of Chemistry and Chemical Engineering, Xiamen University, Xiamen 361005, China

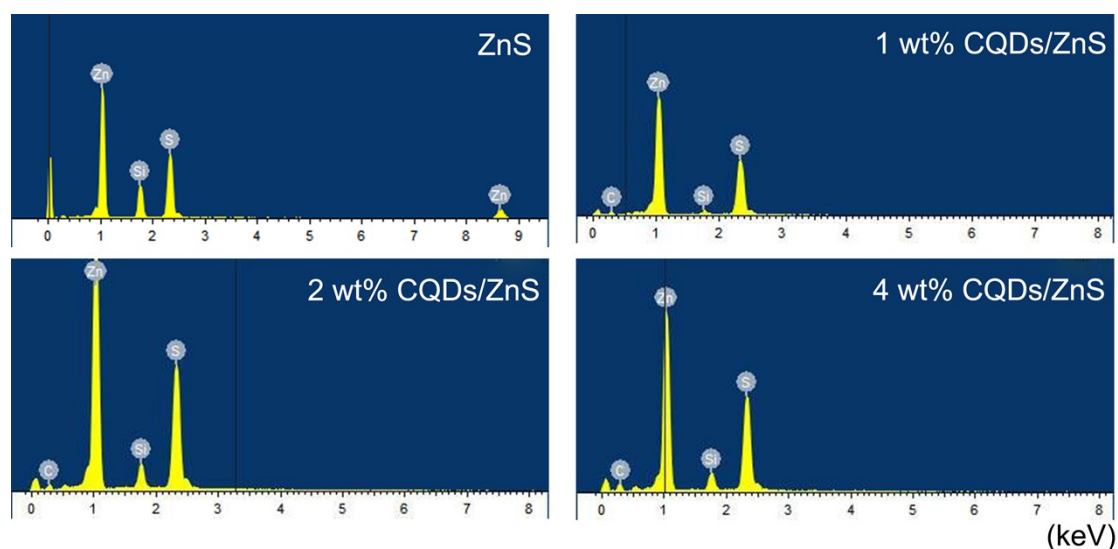

Fig. S1 The EDS patterns of the pure ZnS and the hybrid materials.

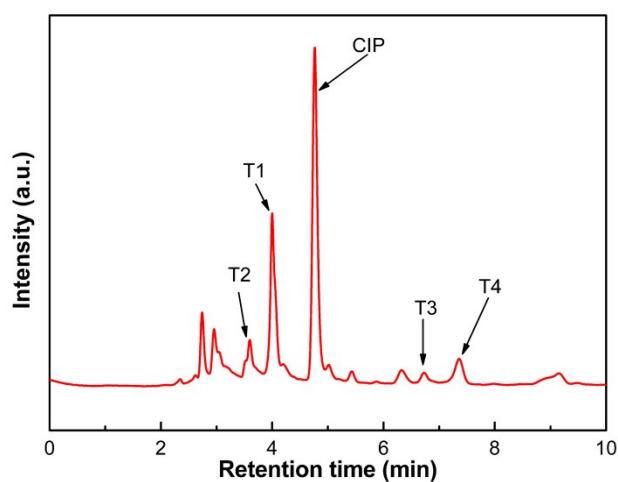

Fig. S2 A representative chromatogram after 30 min of irradiation.

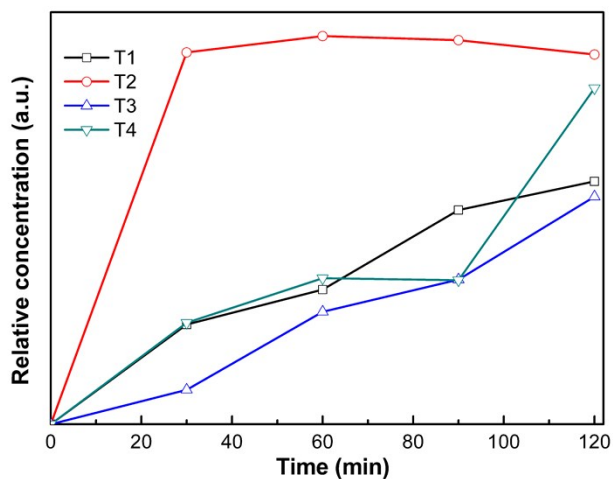

**Fig. S3** The relative kinetic evolution profile of the intermediate products

**Table S1** EDS results for pure ZnS and hybrid materials.

| Samples        | Element | Weight% | Atomic% |
|----------------|---------|---------|---------|
| ZnS            | S K     | 32.07   | 49.09   |
|                | Zn L    | 67.93   | 50.91   |
| 1 wt% CQDs/ZnS | C K     | 0.86    | 3.43    |
|                | S K     | 31.81   | 47.42   |
|                | Zn L    | 67.33   | 49.15   |
| 2 wt% CQDs/ZnS | C K     | 1.72    | 6.59    |
|                | S K     | 33.35   | 47.82   |
|                | Zn L    | 64.93   | 45.59   |
| 4 wt% CQDs/ZnS | C K     | 3.39    | 12.57   |
|                | S K     | 30.77   | 42.69   |
|                | Zn L    | 65.84   | 44.74   |
